# Supplementary material for: Synthesis, characterization and electrochemical lithium-ion storage properties of sulfonylcalix[4]quinone
Source: Royal Society of Chemistry journal article supplement (doi:10.1039/d3qi01682j), 2023-01-01
Supplement: d3qi01682j1.pdf [file d3qi01682j1.pdf]

Supporting Information

**Synthesis, Characterization and Electrochemical Lithium-ion Storage  
Property of Sulfonylcalix[4]quinone**

Meng Zhang<sup>a</sup>, Yilin Lin<sup>a</sup> and Weiwei Huang<sup>\*a,b</sup>

<sup>a</sup> Hebei Key Laboratory of Applied Chemistry, Yanshan University, Qinhuangdao 066004, P. R. China

<sup>b</sup> Key Laboratory of Advanced Energy Materials Chemistry (Ministry of Education), College of Chemistry, Nankai University, Tianjin 300071, P. R. China

\*Corresponding author (email: [huangweiwei@ysu.edu.cn](mailto:huangweiwei@ysu.edu.cn))

# Contents

## Experimental section

|                                                                                                                            |    |
|----------------------------------------------------------------------------------------------------------------------------|----|
| 1. General methods.....                                                                                                    | 3  |
| 2. Structural characterization.....                                                                                        | 3  |
| 3. Electrochemical characterization.....                                                                                   | 3  |
| 4. Density functional theory (DFT) calculation.....                                                                        | 3  |
| 5. Material synthesis.....                                                                                                 | 4  |
| Scheme S1 One-step synthesis method of PTC4A and TC4A.....                                                                 | 4  |
| Fig. S1 FT-IR spectrum of PTC4A.....                                                                                       | 4  |
| Fig. S2 Mass Spectrometry (MS) image of PTC4A.....                                                                         | 4  |
| Fig. S3 <sup>1</sup> H NMR (600 MHz, CDCl <sub>3</sub> ) of PTC4A.....                                                     | 5  |
| Fig. S4 FT-IR spectrum of TC4A.....                                                                                        | 5  |
| Fig. S5 MS image of TC4A.....                                                                                              | 6  |
| Fig. S6 <sup>1</sup> H NMR (600 MHz, CDCl <sub>3</sub> ) of TC4A.....                                                      | 6  |
| Fig. S7 FT-IR spectrum of SC4A.....                                                                                        | 6  |
| Fig. S8 MS image of SC4A.....                                                                                              | 7  |
| Fig. S9 <sup>1</sup> H NMR (600 MHz, (CD <sub>3</sub> ) <sub>2</sub> SO) of SC4A.....                                      | 7  |
| Fig. S10 FT-IR spectrum of Azo-SC4A.....                                                                                   | 7  |
| Fig. S11 MS image of Azo-SC4A.....                                                                                         | 8  |
| Fig. S12 FT-IR spectrum of ASC4A.....                                                                                      | 8  |
| Fig. S13 MS image of SC4Q.....                                                                                             | 8  |
| Table S1. Element compositions of the theoretical calculation and elemental analysis (EA) results of SC4Q.....             | 9  |
| Fig. S14 SEM images of pristine SC4Q particle.....                                                                         | 9  |
| Fig. S15 XRD patterns of pristine SC4Q.....                                                                                | 9  |
| Fig. S16 Proposed redox mechanism and structural evolution of SC4Q cathodes in organic LIBs based on DFT calculations..... | 9  |
| Fig. S17 SEM images of SC4Q-based electrodes under (a, b) fully discharged and (c, d) fully charged states.....            | 10 |
| Fig. S18 Dissolution test of SC4Q electrodes under pristine and reduction states.....                                      | 10 |
| Fig. S19 The SC4Q pellet obtained by powder pressing method under 11 MPa.....                                              | 10 |
| Fig. S20 The partially enlarged image of a complete cycle in the GITT test.....                                            | 11 |
| Fig. S21 Cycle performance of pure KetjenBlack-based LIBs at the current density of 1 C.....                               | 11 |
| Table S2. The atomic coordinates of optimized SC4Q.....                                                                    | 12 |
| Table S3. The atomic coordinates of optimized SC4Q-Li.....                                                                 | 13 |
| Table S4. The atomic coordinates of optimized SC4Q-2Li.....                                                                | 14 |
| Table S5. The atomic coordinates of optimized SC4Q-3Li.....                                                                | 15 |
| Table S6. The atomic coordinates of optimized SC4Q-4Li.....                                                                | 16 |
| Table S7. The atomic coordinates of optimized SC4Q-5Li.....                                                                | 17 |

## Reference

## Experimental section

### 1. General methods

Melting points (mp) were performed using BUCHI M-565. Nuclear magnetic resonance (NMR) spectroscopy was conducted by Bruker 400 MHz (AV/400). Fourier transform infrared (FT-IR) spectrum was measured with Thermo Scientific Nicolet iS10. Electrospray ionization mass spectrometry (ESI-MS) was recorded with Agilent 1290II-6460. Elemental analysis (EA) was obtained on Perkin Elmer 2400.

### 2. Structural characterization

The thermogravimetric analysis (TG, NETZSCH, STA 449 F3) was employed to characterize the thermal stability of SC4Q. X-ray diffraction (XRD, Rigaku Mini-Flex 600) was performed to investigate its material crystallinity. Scanning electron microscopy (SEM, JEOL JSM7500F) and transmission electron microscopy (TEM, FEI Talos F200X G2, AEMC) were used to observe the structural morphology and element distribution of SC4Q.

### 3. Electrochemical characterization

40 wt.% Sulfonylcalix[4]quinone (SC4Q), 40 wt.% ketjenblack (KB) and 20 wt.% poly(vinylidene fluoride) (PVDF) were ground evenly in 1-Methyl-2-pyrrolidinone (NMP) to prepare electrode slurry. Subsequently, it was coated on the collector aluminum foil, vacuum dried at 60 °C for 12 h, and cut into electrode sheets with a diameter of 12 mm. The mass loading of the active substance SC4Q on Al foil was around 0.6-1.0 mg cm<sup>-2</sup>. The pure KB electrode (KB:PVDF=8:2) was prepared to deduct the capacity contribution of conductive carbon.

Within the vacuum glove box, CR2032 standard button batteries were fabricated with SC4Q as the cathode, metal lithium as the anode, and 0.3 M bis(trifluoromethane)sulfonimide lithium salt/N-methyl-N-propylpyrrolidinium bis(trifluoromethane)sulfonimide (LiTFSI/[PY13][TFSI]) as the electrolytes. The electrochemical measurements, including cyclic voltammetry (CV), rate capability, discharge-charge performance, galvanostatic intermittent titration technique (GITT), and electrochemical impedance spectroscopy (EIS) were conducted under 30 °C using the battery testing thermostat. The discharge-charge performance was performed on the Neware CT-4008T with a voltage range of 0.01–3.0 V. CV and EIS tests were performed through the CHI-660E electrochemical workstation with a scan rate of 0.2 mV s<sup>-1</sup> and a frequency range of 10<sup>-2</sup>-10<sup>5</sup> Hz.

### 4. Density functional theory (DFT) calculation

The initial configuration and lithiation structure of SC4Q was constructed by GaussView-6.0 and optimized by Gaussian-16W.<sup>1</sup> The highest occupied molecular orbital (HOMO), the lowest unoccupied molecular orbital (LUMO), and the HOMO-LUMO energy gaps ( $E_g$ ) of SC4Q were calculated under the basis of the B3LYP/6-31G(d, p) group. Considering the dispersion and weak interaction of the organic system, DFT-D3(BJ) was used for molecular dispersion correction.<sup>2</sup> The molecular surface electrostatic potential (MESP) and dipole moment can be found in the output file.

## 5. Material synthesis

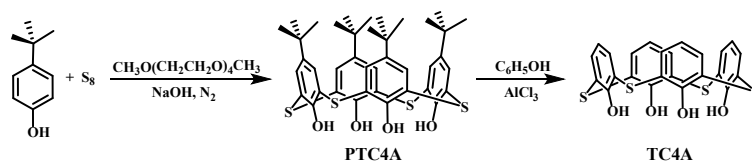

**Scheme S1** One-step synthesis method of PTC4A and TC4A

### **Synthesis and characterization of *p*-tert-butylthiacalix[4]arene (PTC4A)**

Under N<sub>2</sub> atmosphere, a mixture of 32.75 g (0.22 mol) *p*-tert-Butylphenol in 10 ml tetraethylene glycol dimethyl ether was stirred for 15 min and heated gradually to 110 °C for 1 h. Then, 13.75 g (0.054 mol) S<sub>8</sub> and 4.43 g (0.12 mol) NaOH were gradually added to the mixture and kept at 230 °C for a further 4 h. The reaction was continuously monitored by TLC (hexane/chloroform, v:v=1:1). After that, the resulting dark brown mixture was cooled to 130 °C and diluted with 70 ml H<sub>2</sub>SO<sub>4</sub> solution (15 ml conc. H<sub>2</sub>SO<sub>4</sub> in 55 ml H<sub>2</sub>O) and 17.5 ml toluene. After cooling down to room temperature, 140 ml diethyl ether was poured into the reaction mixture. The white product PTC4A was collected by filtration, washed with 1 M HCl, and further purified by recrystallization from chloroform and methanol. The yield obtained was 70%.

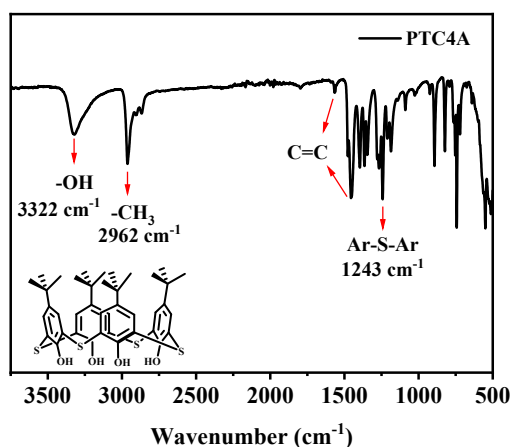

**Figure S1** FT-IR spectrum of PTC4A

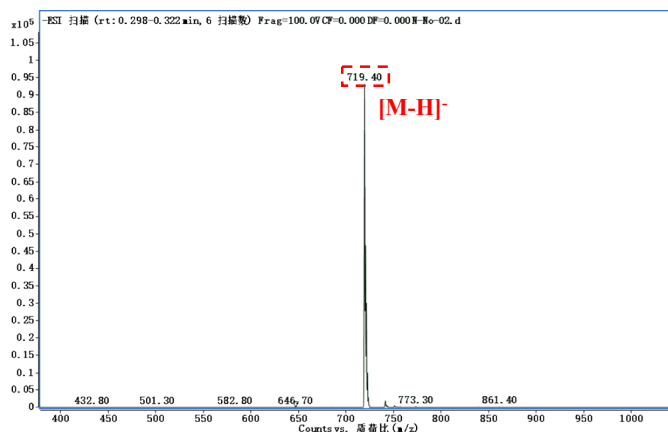

**Figure S2** Mass Spectrometry (MS) image of PTC4A

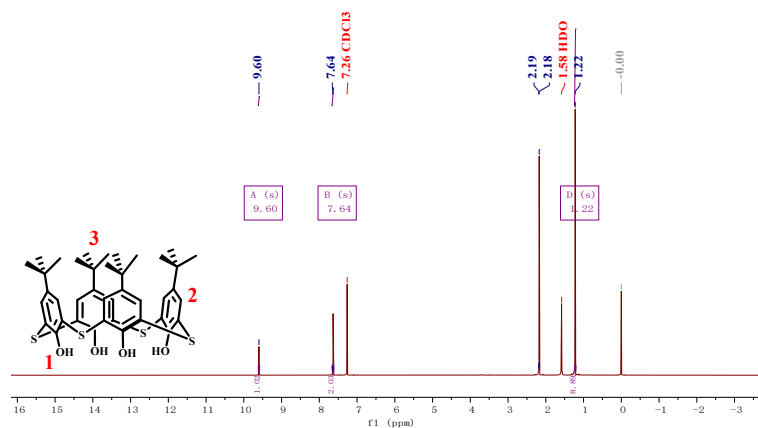

**Figure S3**  $^1\text{H}$  NMR (600 MHz,  $\text{CDCl}_3$ ) of PTCA4A:  $\delta=9.6$  (4H, s, -OH), 7.64 (8H, s, aromatic-H), 1.22 (36H, s,  $-\text{C}(\text{CH}_3)_3$ ) ppm.

### Synthesis and characterization of thiacalix[4]arene (TC4A)

A suspension of 5.0 g (6.94 mmol) PTCA, 3.15 g (3.67 mmol) phenol, and 9.73 g (73.0 mmol)  $\text{AlCl}_3$  was stirred in 200 ml anhydrous toluene at  $80^\circ\text{C}$  for 2 h. After cooling to room temperature, the reaction mixture was washed with water and HCl (v:v=1:10), then the solvent was evaporated in vacuo. The yellowish product was suspended in 100 ml MeOH and refluxed for 30 min. After cooling, the white precipitates were filtered to afford pure TCA with a yield of 73.5%.

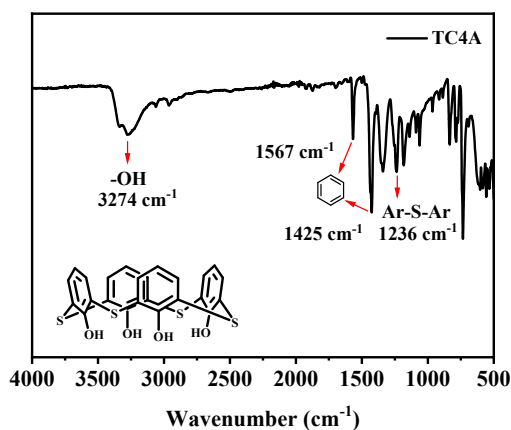

**Figure S4** FT-IR spectrum of TC4A

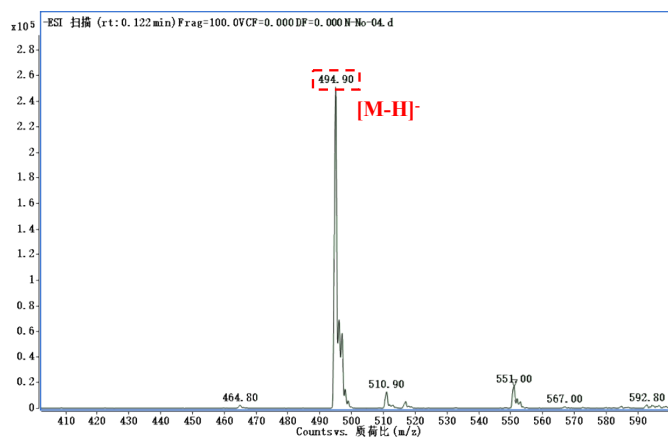

Figure S5 MS image of TC4A

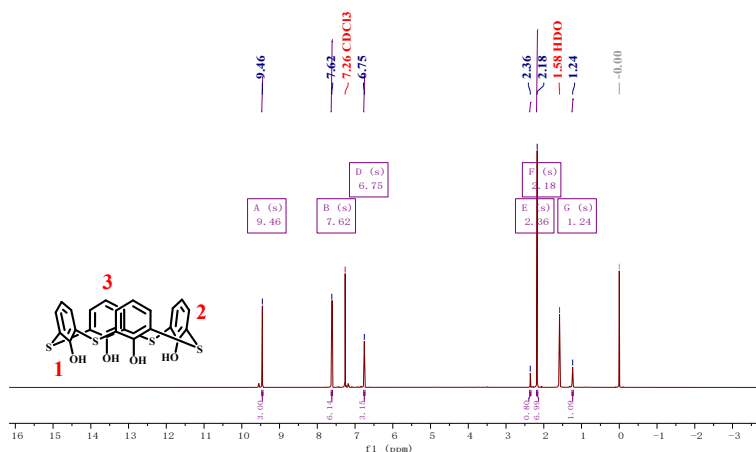

Figure S6  $^1\text{H}$  NMR (600 MHz,  $\text{CDCl}_3$ ) of TC4A:  $\delta=9.46$  (4H, s, -OH), 7.62 (8H, s, aromatic-H), 6.75 (4H, s, aromatic-H) ppm.

### Characterization of sulfonylcalix[4]arene (SC4A)

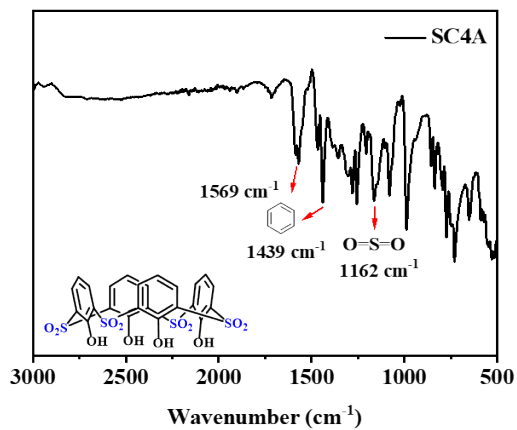

Figure S7 FT-IR spectrum of SC4A

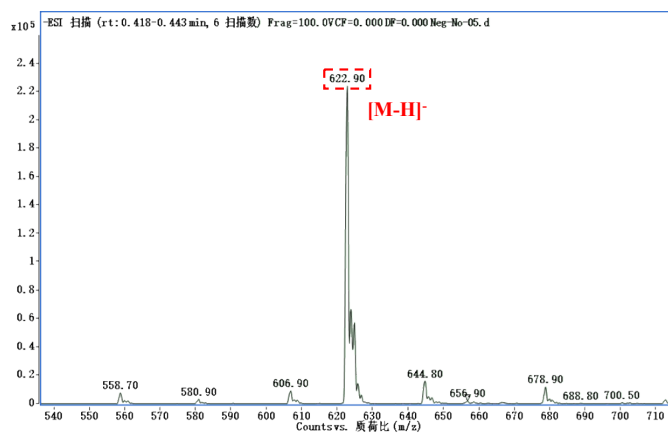

Figure S8 MS image of SC4A

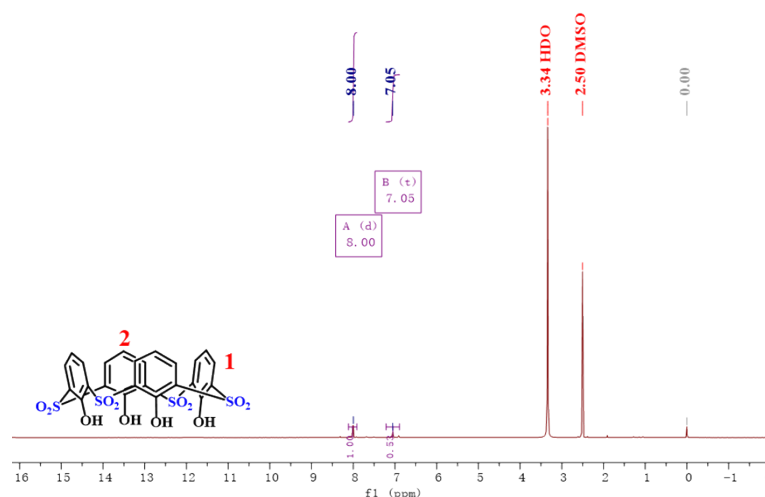

Figure S9  $^1\text{H}$  NMR (600 MHz,  $(\text{CD}_3)_2\text{SO}$ ) of SC4A:  $\delta=8.00$  (d, 8H, aromatic-H), 7.05 (t, 4H, aromatic-H) ppm.

**Characterization of 5,11,17,23-Tetrakis[*p*-carboxyphenyl]azo]-25,26,27,28-tetrahydroxysulfonylcalix[4]arene (Azo-SC4A)**

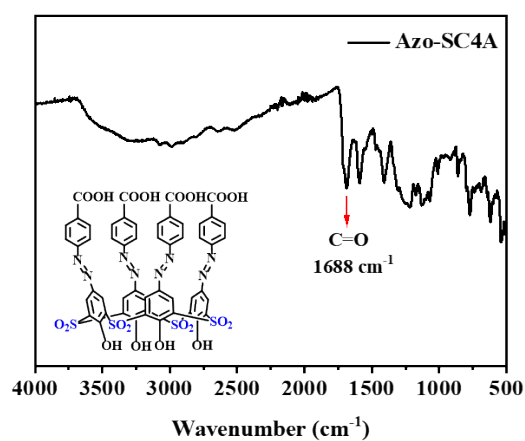

Figure S10 FT-IR spectrum of Azo-SC4A

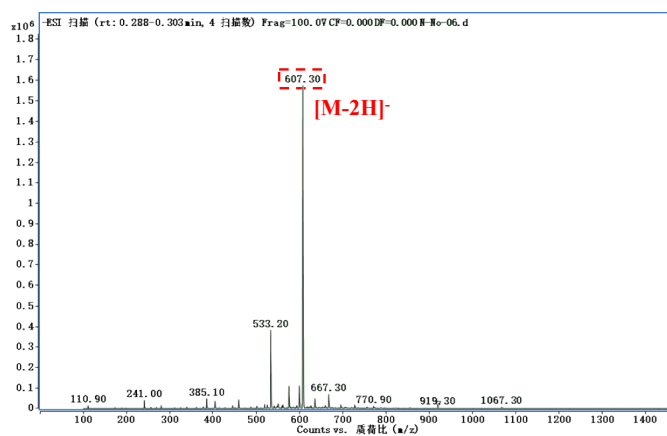

Figure S11 MS image of Azo-SC4A

### Characterization of 5,11,17,23-Tetraaminosulfonylcalix[4]arene (ASC4A)

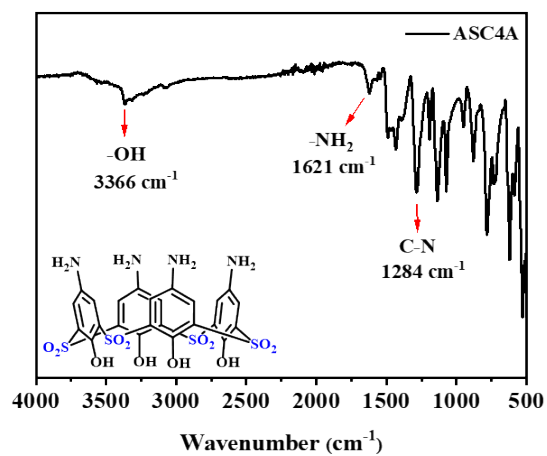

Figure S12 FT-IR spectrum of ASC4A.

### Characterization of SC4Q

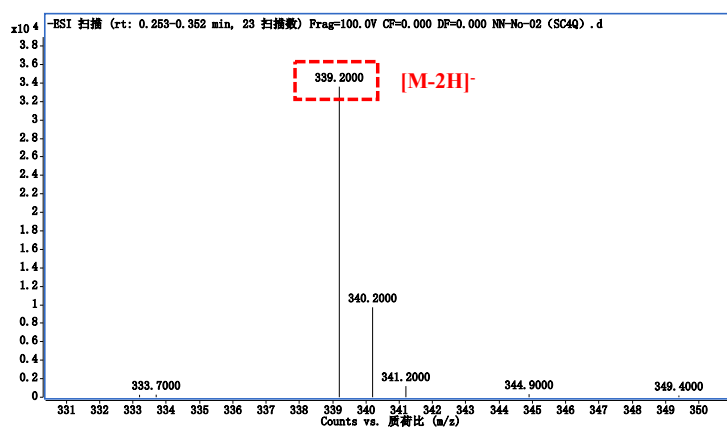

Figure S13 MS image of SC4Q.



**Table S1.** Element compositions of the theoretical calculation and elemental analysis (EA) results of SC4Q.

|                     | C     | O     | S     | H    |
|---------------------|-------|-------|-------|------|
| Theoretical (wt. %) | 42.35 | 37.65 | 18.82 | 1.18 |
| EA                  | 41.83 | 38.51 | 17.72 | 1.94 |

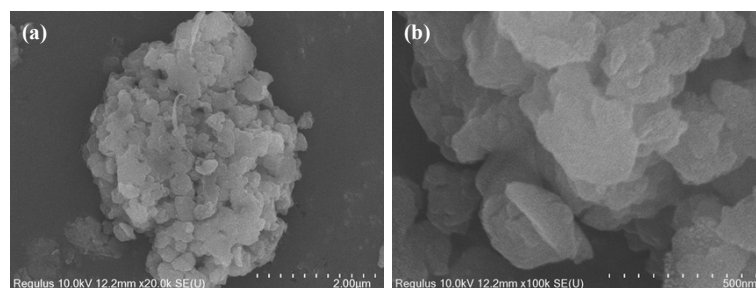

**Figure S14** SEM images of pristine SC4Q particle.

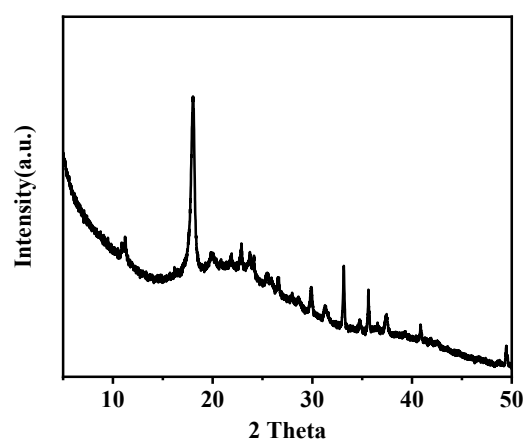

**Figure S15** XRD patterns of pristine SC4Q.

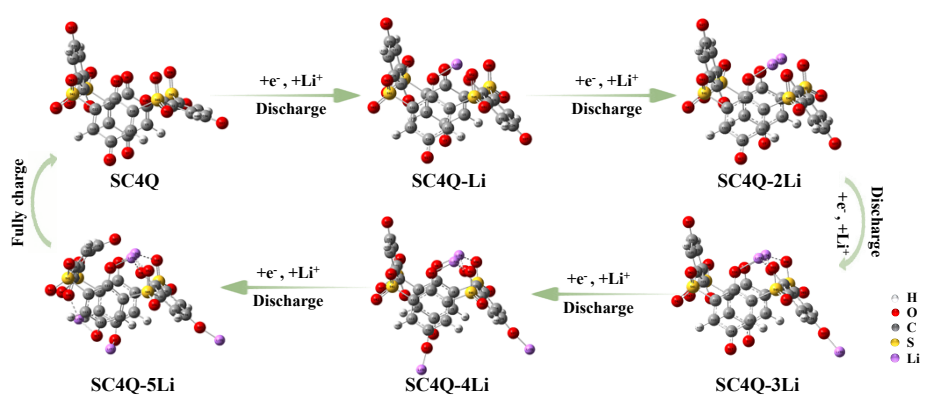

**Figure S16** Proposed redox mechanism and structural evolution of SC4Q cathodes in organic LIBs based on DFT calculations.

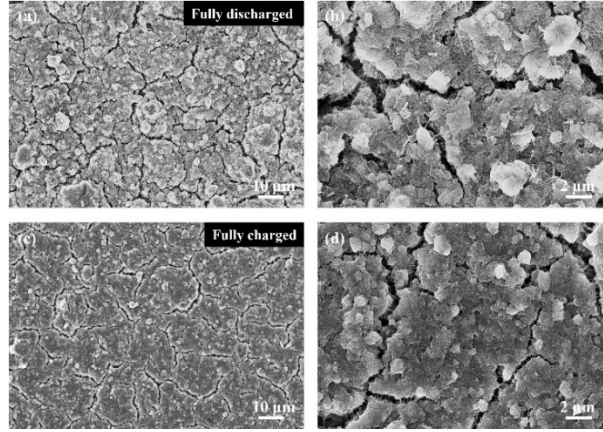

**Figure S17** SEM images of SC4Q-based electrodes under (a, b) fully discharged and (c, d) fully charged states.

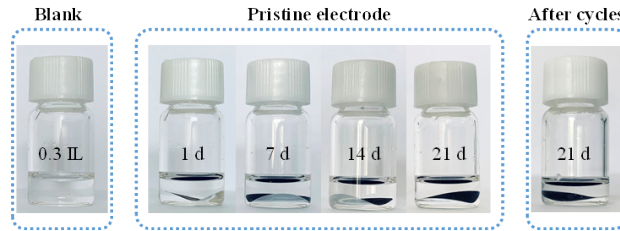

**Figure S18** Dissolution test of SC4Q electrodes under pristine and reduction states.

### Reaction kinetics of the SC4Q electrodes

To elucidate the reaction kinetics of the SC4Q electrodes, the  $\text{Li}^+$  diffusion coefficient  $D_{\text{Li}^+}$  can be verified by the galvanostatic intermittent titration technique (GITT) measurement. The  $D_{\text{Li}^+}$  calculated by the GITT method was based on the following equation:

$$D_{\text{GITT}}^{\text{Li}^+} = \frac{4}{\pi\tau} \left( \frac{m_B V_m}{M_B S} \right)^2 \left( \frac{\Delta E_S}{\Delta E_t} \right)^2$$

where  $\tau$  is the pulse time,  $M_B$  is the mole mass,  $V_m$  is the molar volume,  $S$  is the electrode-electrolyte interface area,  $\Delta E_S$  is the voltage difference between the steady state and the initial state of every step, and  $\Delta E_t$  is the change of total voltage during a pulse step excluding the IR drop. The  $V_m$  ( $532.93 \text{ cm}^3 \text{ mol}^{-1}$ ) of per SC4Q molecule was calculated by measuring the mass and the total volume of a pressed SC4Q pellet.

The weight, thickness and diameter were 78.5 mg, 0.486 mm, and 12.699 mm, respectively. The  $V_m$  of SC4Q molecule is about  $532.93 \text{ cm}^3 \text{ mol}^{-1}$ .

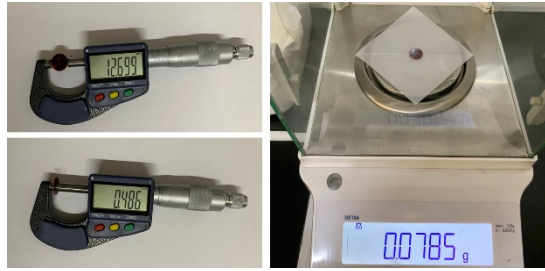

**Figure S19** The SC4Q pellet obtained by powder pressing method under 11 MPa.

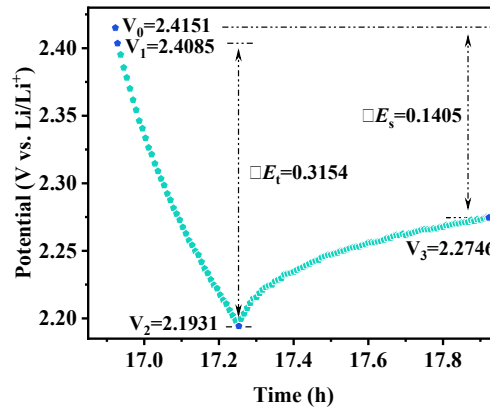

**Figure S20** The partially enlarged image of a complete cycle in the GITT test.

The ionic conductivities of the SC4Q cathode can be calculated with the following equation:

$$\sigma = \frac{L}{R_{ct}S}$$

where  $\sigma$  refers to the ionic conductivity,  $L$  refers to the thickness of active material,  $R_{ct}$  corresponds to the charge transfer impedance (425  $\Omega$  for SC4Q), and  $S$  corresponds to the area of active material ( $S=1.13 \text{ cm}^2$ ). Thus, the ionic conductivities of SC4Q are calculated to be  $1.041 \times 10^{-3} \text{ S m}^{-1}$ , respectively.

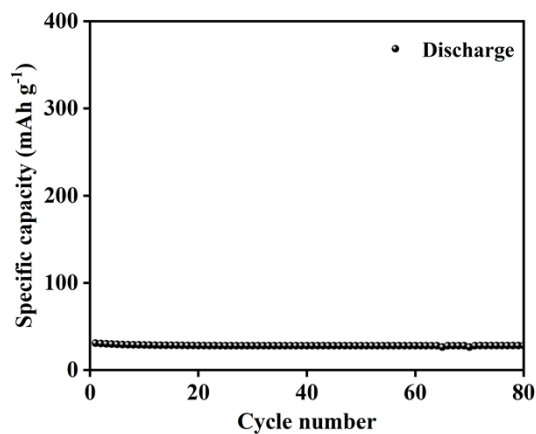

**Figure S21** Cycle performance of pure KetjenBlack-based LIBs at the current density of 1 C.

**Table S2.** The atomic coordinates of optimized SC4Q.

| Center<br>Number | Ato<br>m | Coordinates (Angstroms) |         |         | Center<br>Number | Ato<br>m | Coordinates (Angstroms) |         |         |
|------------------|----------|-------------------------|---------|---------|------------------|----------|-------------------------|---------|---------|
|                  |          | X                       | Y       | Z       |                  |          | X                       | Y       | Z       |
| 1                | C        | 0.4502                  | 4.8292  | -0.2801 | 27               | O        | 8.7596                  | 0.0003  | -6.7937 |
| 2                | C        | 2.4515                  | 5.3620  | 1.6274  | 28               | O        | 3.9900                  | 0.0001  | 2.0473  |
| 3                | C        | 1.9903                  | 6.0105  | 4.0206  | 29               | H        | 7.6790                  | -4.1566 | -4.3230 |
| 4                | C        | -0.6457                 | 6.3953  | 4.8819  | 30               | H        | 7.6786                  | 4.1571  | -4.3231 |
| 5                | C        | -2.6721                 | 6.2065  | 2.9355  | 31               | C        | -4.8842                 | -0.0001 | -0.9370 |
| 6                | C        | -2.1728                 | 5.4536  | 0.5752  | 32               | C        | -6.3793                 | -2.3740 | -1.0832 |
| 7                | O        | -1.1577                 | 6.8678  | 7.0674  | 33               | C        | -8.8998                 | -2.3994 | -0.9070 |
| 8                | O        | 0.9637                  | 3.9374  | -2.3165 | 34               | C        | -10.3530                | -0.0003 | -0.7275 |
| 9                | H        | -4.5634                 | 6.7118  | 3.5390  | 35               | C        | -8.9000                 | 2.3989  | -0.9070 |
| 10               | H        | 3.4958                  | 6.2675  | 5.3863  | 36               | C        | -6.3795                 | 2.3736  | -1.0832 |
| 11               | C        | 0.4507                  | -4.8294 | -0.2802 | 37               | O        | -12.6297                | -0.0004 | -0.4639 |
| 12               | C        | 2.4520                  | -5.3619 | 1.6274  | 38               | O        | -2.6241                 | 0.0000  | -0.5470 |
| 13               | C        | 1.9907                  | -6.0103 | 4.0206  | 39               | H        | -9.9655                 | 4.1492  | -0.8855 |
| 14               | C        | -0.6452                 | -6.3953 | 4.8819  | 40               | H        | -9.9651                 | -4.1499 | -0.8855 |
| 15               | C        | -2.6717                 | -6.2066 | 2.9355  | 41               | S        | 5.7088                  | -5.3099 | 0.5745  |
| 16               | C        | -2.1724                 | -5.4538 | 0.5751  | 42               | O        | 7.2815                  | -5.1871 | 2.8377  |
| 17               | O        | -1.1572                 | -6.8680 | 7.0673  | 43               | O        | 6.0052                  | -7.3447 | -1.2638 |
| 18               | O        | 0.9641                  | -3.9379 | -2.3168 | 44               | S        | 5.7083                  | 5.3104  | 0.5744  |
| 19               | H        | -4.5629                 | -6.7118 | 3.5390  | 45               | S        | -4.8126                 | 5.3938  | -1.6293 |
| 20               | H        | 3.4963                  | -6.2671 | 5.3864  | 46               | S        | -4.8122                 | -5.3940 | -1.6293 |
| 21               | C        | 5.3012                  | 0.0002  | 0.1612  | 47               | O        | 7.2811                  | 5.1877  | 2.8375  |
| 22               | C        | 6.1013                  | 2.3648  | -1.1086 | 48               | O        | 6.0044                  | 7.3451  | -1.2640 |
| 23               | C        | 7.2029                  | 2.4029  | -3.3779 | 49               | O        | -6.5979                 | 7.2982  | -0.7213 |
| 24               | C        | 7.8004                  | 0.0003  | -4.7118 | 50               | O        | -3.8863                 | 5.4063  | -4.2114 |
| 25               | C        | 7.2032                  | -2.4024 | -3.3779 | 51               | O        | -6.5973                 | -7.2986 | -0.7213 |
| 26               | C        | 6.1016                  | -2.3644 | -1.1085 | 52               | O        | -3.8859                 | -5.4065 | -4.2114 |

**Table S3.** The atomic coordinates of optimized SC4Q-Li.

| Center<br>Number | Ato<br>m | Coordinates (Angstroms) |         |         | Center<br>Number | Ato<br>m | Coordinates (Angstroms) |         |         |
|------------------|----------|-------------------------|---------|---------|------------------|----------|-------------------------|---------|---------|
|                  |          | X                       | Y       | Z       |                  |          | X                       | Y       | Z       |
| 1                | C        | 0.2384                  | 2.6140  | -0.1901 | 28               | O        | 1.9299                  | 0.0473  | 1.1606  |
| 2                | C        | 1.2638                  | 2.9175  | 0.8495  | 29               | H        | 4.2572                  | -2.2864 | -1.8791 |
| 3                | C        | 0.9788                  | 3.3522  | 2.0834  | 30               | H        | 4.2765                  | 2.1102  | -2.0553 |
| 4                | C        | -0.4261                 | 3.6267  | 2.4637  | 31               | C        | -2.5718                 | 0.0525  | -0.9883 |
| 5                | C        | -1.4564                 | 3.4670  | 1.4022  | 32               | C        | -3.2672                 | -1.1978 | -0.6930 |
| 6                | C        | -1.1606                 | 2.9857  | 0.1830  | 33               | C        | -4.4833                 | -1.2475 | -0.0845 |
| 7                | O        | -0.7308                 | 4.0073  | 3.5822  | 34               | C        | -5.1793                 | -0.0187 | 0.3076  |
| 8                | O        | 0.5550                  | 2.0737  | -1.2344 | 35               | C        | -4.4991                 | 1.2489  | -0.0064 |
| 9                | H        | -2.4667                 | 3.7652  | 1.6630  | 36               | C        | -3.2824                 | 1.2679  | -0.6033 |
| 10               | H        | 1.7525                  | 3.5158  | 2.8269  | 37               | O        | -6.2800                 | -0.0416 | 0.8673  |
| 11               | C        | 0.2028                  | -2.5546 | -0.1242 | 38               | O        | -1.4478                 | 0.0964  | -1.5329 |
| 12               | C        | 1.1563                  | -2.8903 | 0.9350  | 39               | H        | -5.0069                 | 2.1716  | 0.2536  |
| 13               | C        | 0.7911                  | -3.3797 | 2.1379  | 40               | H        | -4.9779                 | -2.1930 | 0.1091  |
| 14               | C        | -0.6207                 | -3.6936 | 2.4231  | 41               | S        | 2.9207                  | -2.8134 | 0.5681  |
| 15               | C        | -1.5715                 | -3.4918 | 1.3213  | 42               | O        | 3.6290                  | -2.7130 | 1.8471  |
| 16               | C        | -1.1895                 | -2.9437 | 0.1356  | 43               | O        | 3.2061                  | -3.9007 | -0.3750 |
| 17               | O        | -0.9830                 | -4.1287 | 3.5170  | 44               | S        | 3.0045                  | 2.8229  | 0.3840  |
| 18               | O        | 0.5939                  | -1.9703 | -1.1542 | 45               | S        | -2.5546                 | 2.8807  | -0.9949 |
| 19               | H        | -2.5943                 | -3.8085 | 1.4941  | 46               | S        | -2.4762                 | -2.7503 | -1.1177 |
| 20               | H        | 1.5232                  | -3.5702 | 2.9160  | 47               | O        | 3.7767                  | 2.7830  | 1.6295  |
| 21               | C        | 2.7329                  | 0.0044  | 0.2407  | 48               | O        | 3.2415                  | 3.8583  | -0.6258 |
| 22               | C        | 3.2410                  | 1.2303  | -0.4263 | 49               | O        | -3.5275                 | 3.8692  | -0.5111 |
| 23               | C        | 3.9575                  | 1.1998  | -1.5578 | 50               | O        | -2.0636                 | 2.9056  | -2.3674 |
| 24               | C        | 4.3340                  | -0.0974 | -2.1788 | 51               | O        | -3.4552                 | -3.8154 | -0.9082 |
| 25               | C        | 3.9481                  | -1.3367 | -1.4541 | 52               | O        | -1.8314                 | -2.6002 | -2.4473 |
| 26               | C        | 3.2188                  | -1.2755 | -0.3320 | 53               | Li       | -0.4983                 | -1.1994 | -2.4798 |
| 27               | O        | 4.9236                  | -0.1440 | -3.2459 |                  |          |                         |         |         |

**Table S4.** The atomic coordinates of optimized SC4Q-2Li.

| Center<br>Number | Ato<br>m | Coordinates (Angstroms) |         |         | Center<br>Number | Ato<br>m | Coordinates (Angstroms) |         |         |
|------------------|----------|-------------------------|---------|---------|------------------|----------|-------------------------|---------|---------|
|                  |          | X                       | Y       | Z       |                  |          | X                       | Y       | Z       |
| 1                | C        | 0.1947                  | 2.6102  | -0.1251 | 28               | O        | 1.8920                  | 0.0020  | 1.2135  |
| 2                | C        | 1.1645                  | 2.9049  | 0.9274  | 29               | H        | 4.2599                  | -2.1878 | -1.9027 |
| 3                | C        | 0.8213                  | 3.3692  | 2.1476  | 30               | H        | 4.2540                  | 2.2099  | -1.8942 |
| 4                | C        | -0.5847                 | 3.6821  | 2.4659  | 31               | C        | -2.5255                 | -0.0031 | -1.1819 |
| 5                | C        | -1.5542                 | 3.5175  | 1.3703  | 32               | C        | -3.1679                 | -1.2152 | -0.7162 |
| 6                | C        | -1.1847                 | 3.0101  | 0.1645  | 33               | C        | -4.2864                 | -1.2298 | 0.0785  |
| 7                | O        | -0.9254                 | 4.0888  | 3.5752  | 34               | C        | -4.9292                 | -0.0052 | 0.5319  |
| 8                | O        | 0.5586                  | 2.0462  | -1.1831 | 35               | C        | -4.2913                 | 1.2206  | 0.0750  |
| 9                | H        | -2.5732                 | 3.8338  | 1.5627  | 36               | C        | -3.1727                 | 1.2078  | -0.7197 |
| 10               | H        | 1.5681                  | 3.5373  | 2.9164  | 37               | O        | -5.9424                 | -0.0062 | 1.2473  |
| 11               | C        | 0.2033                  | -2.6100 | -0.1276 | 38               | O        | -1.4785                 | -0.0023 | -1.9487 |
| 12               | C        | 1.1766                  | -2.9040 | 0.9217  | 39               | H        | -4.7449                 | 2.1591  | 0.3705  |
| 13               | C        | 0.8383                  | -3.3754 | 2.1406  | 40               | H        | -4.7361                 | -2.1692 | 0.3770  |
| 14               | C        | -0.5655                 | -3.6959 | 2.4608  | 41               | S        | 2.9302                  | -2.8170 | 0.5216  |
| 15               | C        | -1.5387                 | -3.5283 | 1.3688  | 42               | O        | 3.6662                  | -2.7582 | 1.7875  |
| 16               | C        | -1.1740                 | -3.0155 | 0.1640  | 43               | O        | 3.2006                  | -3.8692 | -0.4653 |
| 17               | O        | -0.9015                 | -4.1108 | 3.5685  | 44               | S        | 2.9193                  | 2.8266  | 0.5308  |
| 18               | O        | 0.5626                  | -2.0391 | -1.1840 | 45               | S        | -2.4970                 | 2.8355  | -1.0659 |
| 19               | H        | -2.5563                 | -3.8483 | 1.5628  | 46               | S        | -2.4899                 | -2.8415 | -1.0630 |
| 20               | H        | 1.5872                  | -3.5435 | 2.9074  | 47               | O        | 3.6530                  | 2.7676  | 1.7980  |
| 21               | C        | 2.6972                  | 0.0048  | 0.2944  | 48               | O        | 3.1872                  | 3.8825  | -0.4529 |
| 22               | C        | 3.1997                  | 1.2595  | -0.3196 | 49               | O        | -3.5152                 | 3.8351  | -0.7518 |
| 23               | C        | 3.9344                  | 1.2773  | -1.4403 | 50               | O        | -1.8899                 | 2.8458  | -2.4264 |
| 24               | C        | 4.3058                  | 0.0115  | -2.1229 | 51               | O        | -3.5057                 | -3.8428 | -0.7464 |
| 25               | C        | 3.9375                  | -1.2579 | -1.4453 | 52               | O        | -1.8856                 | -2.8506 | -2.4246 |
| 26               | C        | 3.2028                  | -1.2465 | -0.3245 | 53               | Li       | -0.5752                 | -1.5396 | -2.5709 |
| 27               | O        | 4.8729                  | 0.0144  | -3.2045 | 54               | Li       | -0.5778                 | 1.5377  | -2.5707 |

**Table S5.** The atomic coordinates of optimized SC4Q-3Li.

| Center<br>Number | Ato<br>m | Coordinates (Angstroms) |         |         | Center<br>Number | Ato<br>m | Coordinates (Angstroms) |         |         |
|------------------|----------|-------------------------|---------|---------|------------------|----------|-------------------------|---------|---------|
|                  |          | X                       | Y       | Z       |                  |          | X                       | Y       | Z       |
| 1                | C        | 0.2886                  | 2.6185  | -0.1392 | 29               | H        | 4.3453                  | -2.2027 | -1.8610 |
| 2                | C        | 1.2399                  | 2.9040  | 0.9294  | 30               | H        | 4.3449                  | 2.1954  | -1.8659 |
| 3                | C        | 0.8848                  | 3.3444  | 2.1583  | 31               | C        | -2.4638                 | 0.0057  | -1.2468 |
| 4                | C        | -0.5223                 | 3.6270  | 2.4693  | 32               | C        | -3.1262                 | -1.1821 | -0.8184 |
| 5                | C        | -1.4821                 | 3.4463  | 1.3698  | 33               | C        | -4.3180                 | -1.1912 | -0.0908 |
| 6                | C        | -1.1052                 | 2.9649  | 0.1573  | 34               | C        | -4.9648                 | 0.0011  | 0.2828  |
| 7                | O        | -0.8858                 | 4.0132  | 3.5838  | 35               | C        | -4.3205                 | 1.1958  | -0.0866 |
| 8                | O        | 0.6804                  | 2.1032  | -1.2125 | 36               | C        | -3.1285                 | 1.1909  | -0.8145 |
| 9                | H        | -2.5116                 | 3.7230  | 1.5674  | 37               | O        | -6.0919                 | -0.0001 | 0.9546  |
| 10               | H        | 1.6262                  | 3.5030  | 2.9339  | 38               | O        | -1.3426                 | 0.0078  | -1.9432 |
| 11               | C        | 0.2894                  | -2.6148 | -0.1418 | 39               | H        | -4.7656                 | 2.1428  | 0.1939  |
| 12               | C        | 1.2365                  | -2.9070 | 0.9278  | 40               | H        | -4.7613                 | -2.1402 | 0.1860  |
| 13               | C        | 0.8775                  | -3.3529 | 2.1540  | 41               | S        | 2.9945                  | -2.8240 | 0.5564  |
| 14               | C        | -0.5303                 | -3.6339 | 2.4603  | 42               | O        | 3.7129                  | -2.7510 | 1.8332  |
| 15               | C        | -1.4858                 | -3.4488 | 1.3585  | 43               | O        | 3.2959                  | -3.8824 | -0.4158 |
| 16               | C        | -1.1048                 | -2.9617 | 0.1490  | 44               | S        | 2.9969                  | 2.8206  | 0.5522  |
| 17               | O        | -0.8976                 | -4.0274 | 3.5717  | 45               | S        | -2.4249                 | 2.8063  | -1.0838 |
| 18               | O        | 0.6852                  | -2.0937 | -1.2118 | 46               | S        | -2.4209                 | -2.7962 | -1.0943 |
| 19               | H        | -2.5160                 | -3.7261 | 1.5514  | 47               | O        | 3.7186                  | 2.7494  | 1.8272  |
| 20               | H        | 1.6168                  | -3.5162 | 2.9306  | 48               | O        | 3.2943                  | 3.8783  | -0.4219 |
| 21               | C        | 2.7707                  | -0.0017 | 0.3178  | 49               | O        | -3.4279                 | 3.8199  | -0.7475 |
| 22               | C        | 3.2766                  | 1.2519  | -0.2980 | 50               | O        | -1.7934                 | 2.8685  | -2.4336 |
| 23               | C        | 4.0211                  | 1.2644  | -1.4118 | 51               | O        | -3.4258                 | -3.8110 | -0.7666 |
| 24               | C        | 4.4020                  | -0.0040 | -2.0838 | 52               | O        | -1.7868                 | -2.8503 | -2.4432 |
| 25               | C        | 4.0217                  | -1.2707 | -1.4088 | 53               | Li       | -0.4906                 | -1.5123 | -2.5584 |
| 26               | C        | 3.2765                  | -1.2563 | -0.2954 | 54               | Li       | -0.4996                 | 1.5304  | -2.5631 |
| 27               | O        | 4.9914                  | -0.0049 | -3.1542 | 55               | Li       | -7.4929                 | -0.0776 | 1.8000  |
| 28               | O        | 1.9654                  | -0.0003 | 1.2364  |                  |          |                         |         |         |

**Table S6.** The atomic coordinates of optimized SC4Q-4Li.

| Center<br>Number | Ato<br>m | Coordinates (Angstroms) |         |         | Center<br>Number | Ato<br>m | Coordinates (Angstroms) |         |         |
|------------------|----------|-------------------------|---------|---------|------------------|----------|-------------------------|---------|---------|
|                  |          | X                       | Y       | Z       |                  |          | X                       | Y       | Z       |
| 1                | C        | -0.2154                 | -2.6650 | -0.0224 | 29               | H        | -4.4233                 | 1.9454  | -1.9905 |
| 2                | C        | -1.1644                 | -2.8825 | 1.0722  | 30               | H        | -4.3184                 | -2.4422 | -1.7554 |
| 3                | C        | -0.7940                 | -3.1938 | 2.3307  | 31               | C        | 2.4634                  | -0.0955 | -1.2820 |
| 4                | C        | 0.6275                  | -3.3942 | 2.6616  | 32               | C        | 3.0756                  | 1.1386  | -0.9111 |
| 5                | C        | 1.5845                  | -3.2965 | 1.5423  | 33               | C        | 4.2854                  | 1.2189  | -0.2298 |
| 6                | C        | 1.1962                  | -2.9459 | 0.2938  | 34               | C        | 5.0027                  | 0.0677  | 0.1597  |
| 7                | O        | 1.0031                  | -3.6562 | 3.8036  | 35               | C        | 4.3978                  | -1.1650 | -0.1210 |
| 8                | O        | -0.6237                 | -2.2660 | -1.1294 | 36               | C        | 3.1839                  | -1.2347 | -0.8160 |
| 9                | H        | 2.6206                  | -3.5263 | 1.7647  | 37               | O        | 6.1633                  | 0.1532  | 0.7776  |
| 10               | H        | -1.5275                 | -3.3055 | 3.1218  | 38               | O        | 1.3396                  | -0.1754 | -1.9617 |
| 11               | C        | -0.3990                 | 2.5251  | -0.3444 | 39               | H        | 4.8854                  | -2.0811 | 0.1900  |
| 12               | C        | -1.3183                 | 2.8975  | 0.6902  | 40               | H        | 4.6930                  | 2.1964  | 0.0003  |
| 13               | C        | -0.9589                 | 3.4684  | 1.8917  | 41               | S        | -3.0604                 | 2.7445  | 0.3594  |
| 14               | C        | 0.3965                  | 3.7791  | 2.1619  | 42               | O        | -3.7751                 | 2.7046  | 1.6463  |
| 15               | C        | 1.3341                  | 3.5074  | 1.1402  | 43               | O        | -3.4591                 | 3.7270  | -0.6601 |
| 16               | C        | 0.9610                  | 2.9077  | -0.0589 | 44               | S        | -2.9230                 | -2.8868 | 0.6786  |
| 17               | O        | 0.7585                  | 4.3172  | 3.3015  | 45               | S        | 2.5069                  | -2.8648 | -0.9704 |
| 18               | O        | -0.8138                 | 1.9074  | -1.3899 | 46               | S        | 2.2862                  | 2.7139  | -1.2527 |
| 19               | H        | 2.3666                  | 3.7983  | 1.2953  | 47               | O        | -3.6498                 | -2.7813 | 1.9488  |
| 20               | H        | -1.7195                 | 3.6803  | 2.6352  | 48               | O        | -3.1618                 | -4.0174 | -0.2284 |
| 21               | C        | -2.7713                 | -0.0843 | 0.2854  | 49               | O        | 3.5160                  | -3.8486 | -0.5668 |
| 22               | C        | -3.2478                 | -1.3831 | -0.2613 | 50               | O        | 1.8549                  | -3.0396 | -2.3005 |
| 23               | C        | -4.0071                 | -1.4808 | -1.3602 | 51               | O        | 3.2785                  | 3.7651  | -0.9884 |
| 24               | C        | -4.4340                 | -0.2581 | -2.0914 | 52               | O        | 1.6969                  | 2.6494  | -2.6239 |
| 25               | C        | -4.0738                 | 1.0462  | -1.4942 | 53               | Li       | 0.3981                  | 1.3118  | -2.6237 |
| 26               | C        | -3.3021                 | 1.1196  | -0.3994 | 54               | Li       | 0.5443                  | -1.7299 | -2.5308 |
| 27               | O        | -5.0548                 | -0.3407 | -3.1426 | 55               | Li       | 7.6862                  | 0.2539  | 1.3574  |
| 28               | O        | -1.9864                 | -0.0340 | 1.2208  | 56               | Li       | 0.9856                  | 4.9398  | 4.8031  |



**Table S7.** The atomic coordinates of optimized SC4Q-5Li.

| Center<br>Number | Ato<br>m | Coordinates (Angstroms) |         |         | Center<br>Number | Ato<br>m | Coordinates (Angstroms) |         |         |
|------------------|----------|-------------------------|---------|---------|------------------|----------|-------------------------|---------|---------|
|                  |          | X                       | Y       | Z       |                  |          | X                       | Y       | Z       |
| 1                | C        | 0.2285                  | -2.7540 | -0.3895 | 30               | H        | -2.0508                 | -2.4703 | -2.5329 |
| 2                | C        | -0.7792                 | -2.9390 | 0.6451  | 31               | C        | 2.4263                  | 0.4982  | -0.8720 |
| 3                | C        | -0.5095                 | -2.7337 | 1.9740  | 32               | C        | 2.8250                  | 1.7355  | -0.3014 |
| 4                | C        | 0.7898                  | -2.2986 | 2.4078  | 33               | C        | 4.0314                  | 1.9561  | 0.3623  |
| 5                | C        | 1.8351                  | -2.2519 | 1.4194  | 34               | C        | 4.9757                  | 0.9220  | 0.5142  |
| 6                | C        | 1.5640                  | -2.4503 | 0.0940  | 35               | C        | 4.5997                  | -0.3393 | 0.0117  |
| 7                | O        | 0.9904                  | -1.8878 | 3.6099  | 36               | C        | 3.3834                  | -0.5262 | -0.6441 |
| 8                | O        | -0.0559                 | -2.7717 | -1.6139 | 37               | O        | 6.1334                  | 1.1173  | 1.1097  |
| 9                | H        | 2.8289                  | -1.9722 | 1.7534  | 38               | O        | 1.2696                  | 0.3174  | -1.4846 |
| 10               | H        | -1.2967                 | -2.8741 | 2.7113  | 39               | H        | 5.2631                  | -1.1878 | 0.1401  |
| 11               | C        | -1.0684                 | 2.6603  | -0.1843 | 40               | H        | 4.2438                  | 2.9439  | 0.7564  |
| 12               | C        | -2.1906                 | 2.5117  | 0.7184  | 41               | S        | -3.8363                 | 2.2766  | 0.0234  |
| 13               | C        | -2.0198                 | 2.0654  | 2.0108  | 42               | O        | -4.7660                 | 2.0572  | 1.1357  |
| 14               | C        | -0.7455                 | 1.6454  | 2.4707  | 43               | O        | -4.1356                 | 3.2545  | -1.0226 |
| 15               | C        | 0.4007                  | 2.0359  | 1.7042  | 44               | S        | -2.4965                 | -3.2296 | 0.1512  |
| 16               | C        | 0.2432                  | 2.5579  | 0.4462  | 45               | S        | 2.9368                  | -2.1812 | -1.0767 |
| 17               | O        | -0.6708                 | 0.8140  | 3.4954  | 46               | S        | 1.7178                  | 3.0968  | -0.4726 |
| 18               | O        | -1.2062                 | 2.7338  | -1.4343 | 47               | O        | -3.2850                 | -3.3010 | 1.3876  |
| 19               | H        | 1.3950                  | 1.8539  | 2.1031  | 48               | O        | -2.5589                 | -4.3002 | -0.8447 |
| 20               | H        | -2.8993                 | 1.8833  | 2.6199  | 49               | O        | 4.0166                  | -3.1061 | -0.7163 |
| 21               | C        | -3.1308                 | -0.4609 | 0.0557  | 50               | O        | 2.4255                  | -2.1854 | -2.4704 |
| 22               | C        | -2.7774                 | -1.6604 | -0.6988 | 51               | O        | 2.2505                  | 4.2742  | 0.2230  |
| 23               | C        | -2.3523                 | -1.5849 | -1.9927 | 52               | O        | 1.3723                  | 3.2128  | -1.9131 |
| 24               | C        | -2.0695                 | -0.2654 | -2.5441 | 53               | Li       | 0.1936                  | 1.6718  | -2.4072 |
| 25               | C        | -2.8909                 | 0.8145  | -2.0425 | 54               | Li       | 0.6958                  | -1.1795 | -2.5978 |
| 26               | C        | -3.3888                 | 0.7179  | -0.7665 | 55               | Li       | 7.6636                  | 1.3856  | 1.6179  |
| 27               | O        | -1.0508                 | -0.0713 | -3.2781 | 56               | Li       | -2.0469                 | -0.3722 | 2.7432  |
| 28               | O        | -3.1499                 | -0.4403 | 1.3142  | 57               | Li       | 0.6336                  | -0.2379 | 4.1994  |
| 29               | H        | -2.9664                 | 1.7418  | -2.5933 |                  |          |                         |         |         |

## References

- 1 M. J. Frisch, G. W. Trucks, H. B. Schlegel, G. E. Scuseria, M. A. Robb, J. R. Cheeseman, G. Scalmani, V. Barone, G. A. Petersson, H. Nakatsuji, X. Li, M. Caricato, A. V. Marenich, J. Bloino, B. G. Janesko, R. Gomperts, B. Mennucci, H. P. Hratchian, J. V. Ortiz, A. F. Izmaylov, J. L. Sonnenberg, Williams, F. Ding, F. Lipparini, F. Egidi, J. Goings, B. Peng, A. Petrone, T. Henderson, D. Ranasinghe, V. G. Zakrzewski, J. Gao, N. Rega, G. Zheng, W. Liang, M. Hada, M. Ehara, K. Toyota, R. Fukuda, J. Hasegawa, M. Ishida, T. Nakajima, Y. Honda, O. Kitao, H. Nakai, T. Vreven, K. Throssell, J. A. Montgomery Jr., J. E. Peralta, F. Ogliaro, M. J. Bearpark, J. J. Heyd, E. N. Brothers, K. N. Kudin, V. N. Staroverov, T. A. Keith, R. Kobayashi, J. Normand, K. Raghavachari, A. P. Rendell, J. C. Burant, S. S. Iyengar, J. Tomasi, M. Cossi, J. M. Millam, M. Klene, C. Adamo, R. Cammi, J. W. Ochterski, R. L. Martin, K. Morokuma, O. Farkas, J. B. Foresman and D. J. Fox, Gaussian 16 Revision A.03, *Gaussian, Inc.*, Wallingford, CT, USA, 2016.

2 L. Goerigk, A. Hansen, C. Bauer, S. Ehrlich, A. Najibi and S. Grimme, A look at the density functional theory zoo with the advanced GMTKN55 database for general main group thermochemistry, kinetics and noncovalent interactions, *Phys. Chem. Chem. Phys.*, 2017, **19**, 32184-32215.
